# Supplementary material
Source: PubMed Central journal article supplement (PMC6397979)

**Title:** Myeloid TBK1 signaling contributes to the immune response to influenza

**Authors:** Robert S. Hagan, Jose Torres-Castillo, and Claire M. Doerschuk

ONLINE DATA SUPPLEMENT

## Supplemental Online Methods

*Cell culture* – To generate macrophages, bone marrow was flushed from mouse femurs onto non-tissue culture treated plates and grown in media containing 20% L929-conditioned media and 10% FCS. Nonadherent cells were removed after 24 hours and media was changed at day 4 and day 6. After day 7 cells were washed into RPMI supplemented with 10% FCS and 1% penicillin-streptomycin and glutamine. Alveolar macrophages were isolated by bronchoalveolar lavage with PBS/EDTA from euthanized mice and checked for purity by flow cytometry for CD64 and F4/80. For western blot experiments, macrophages from mice of the same genotype were pooled to achieve sufficient numbers. WT and TBK1 KO MEFs were a kind gift of Dr. Tony Polervino (Amgen). LPS (E. coli O55:B5 ultrapure) and poly(I:C) were from Invitrogen.

*RNA isolation and analysis of gene expression* – tissue culture and sorted cells were lysed in QIAzol lysis reagent (Qiagen). Lungs were snap frozen in liquid N<sub>2</sub> at the time of harvest and homogenized in QIAzol. RNA was purified using the RNA Easy kit (Qiagen) and reverse transcribed with Superscript III RT (Thermo Fisher) or iScript (Bio-Rad). cDNA was amplified by qPCR using TaqMan Universal Master Mix II (Invitrogen) or SSo Advance Supermix (Bio-Rad) on an ABI 7500 Fast or ABI OneStepPlus thermocycler with Taqman probes (Applied Biosystems, Thermo Fisher). Samples included a reference 18S RNA probe, and gene expression was quantitated by  $2^{-\Delta\Delta Ct}$  method(36). Taqman probes (Applied Biosystems/Thermo Fisher) are described in Supplemental Methods Table 1. IAV M2 gene was quantitated by RT-qPCR using Syber Green (Thermo Fisher) and previously described primers(37). For *in vivo* experiments, fold induction was calculated relative to an average of 3 separate day 0 lung samples per

genotype. For data in Figure 3C and Figure 7C, qPCR was performed with Sybr Green (Thermo Fisher) using primer pair sets derived from the Massachusetts General Hospital Primer Bank.

*Viral titering* -- Lung viral levels were determined by TCID<sub>50</sub> method on MDCK cells. Lungs were snap frozen in liquid N<sub>2</sub> at time of harvest. For analysis, lungs were thawed on ice and homogenized in ice cold PBS and TCID<sub>50</sub> was measured by serial dilution on MDCK cells.

*Immunoblotting and antibodies* – Cells were lysed in complete RIPA buffer and lysates were resolved by SDS-PAGE. Prior to western blotting, lysates were transferred to nitrocellulose membranes. For phospho-specific antibodies, membranes were blocked with 1%/BSA in TBST prior to probing. Antibodies are listed in the Supplemental Methods Table 2.

*Flow cytometry and sorting* – Lungs were digested by intratracheal instillation via a 20-gauge catheter with 1 mL of 5 mg/mL collagenase I (Worthington Biochemical Corp) and 0.25 mg/mL DNase I (Sigma) prepared in RPMI media (Life Technologies) prior to instilling 0.5 mL of 1% (wt/vol) low melting agarose (Invitrogen) similar to previous descriptions(34). Lungs were incubated at 37°C for 30 minutes and then minced, triturated through an 18-gauge needle, and filtered through a 100 μM filter prior to RBC lysis and staining. Single cell suspensions were suspended in buffer (PBS/1.6% BSA, Sigma) and total cell count determined by hemocytometer. Cells (1.0-1.5 x 10<sup>6</sup>) were blocked with rat anti-mouse FcγRIII/II receptor (CD16/32; BD Biosciences) for 5-10 minutes at 4° C to prevent non-specific antibody binding. After Fc blocking, cells were surface stained for 15-20 minutes at room temperature. Unbound antibody was washed away and samples were fixed with 1% paraformaldehyde. Flow cytometry was performed using a Cytoflex flow cytometer (Beckman Coulter, Brea, CA) and analyzed using

CytExpert (Beckman Coulter) software. Antibodies are described in Supplemental Methods Table 3. Cell sorting was performed using a BD FACSAria II. AM, IM and InfM subpopulations were isolated based on expression patterns described above. Purity was confirmed by post-sort cytometry and was over 95% in all experiments.

**Supplemental Methods Table 1: RT qPCR probesets for gene expression studies**

| <b>Gene</b>    | <b>Thermo Taqman probe number</b> |
|----------------|-----------------------------------|
| IFN $\alpha$ 4 | mm00833969_s1                     |
| IFN $\beta$ 1  | mm00439552_s1                     |
| TNF $\alpha$   | mm00443258_m1                     |
| IL6            | mm00515153_m1                     |
| IFIT1          | mm00446190_m1                     |
| Mx1            | mm00487796_m1                     |
| CXCL10         | mm00445235_m1                     |
| 18S            | 4310893E                          |
| CCL5/RANTES    | mm01302427_m1                     |
| IL10           | mm00439614_m1                     |
| CCL2           | mm00441242_m1                     |
| CCL3           | mm00441259_m1                     |
| CCL4           | mm00443111_m1                     |
| IL12a          | mm00434165_m1                     |
| CCL20          | mm0044228_m1                      |

| <b>Gene</b> | <b>Primer pair sequence</b>                      |
|-------------|--------------------------------------------------|
| ActB        | GATGTATGAAGGCTTTGGGTC<br>TGTGCACTTTTATTGGTCTC    |
| IL6         | GTCAGGGGTGGTTATTGCAT<br>AGTGAGGAACAAGCCAGAGC     |
| CXCL10      | GCCGTCATTTTCTGCCTCA<br>CGTCCTTGCGAGAGGGATC       |
| Mx1         | GACCATAGGGGTCTTGACCAA<br>AGACTTGCTCTTTCTGAAAAGCC |

|               |                                                 |
|---------------|-------------------------------------------------|
| TNF $\alpha$  | CCCTCACACTCAGATCATCTTCT<br>GCTACGACGTGGGCTACAG  |
| CCL2          | TGGCTCAGCCAGATGCAGT<br>TTGGGATCATCTTGCTGGTG     |
| CCL4          | TCTTGCTCGTGGCTGCCT<br>GGGAGGGTCAGAGCCCA         |
| CCL5          | CAAGTGCTCCAATCTTGCAGTC<br>TTCTCTGGGTTGGCACACAC  |
| IFN $\beta$ 1 | CAGCTCCAAGAAAGGACGAAC<br>GGCAGTGTA ACTCTTCTGCAT |

**Supplemental Methods Table 2: Western blot antibodies**

| <b>Antibody</b>                 | <b>Manufacturer</b> | <b>Catalog number</b> |
|---------------------------------|---------------------|-----------------------|
| anti-TBK1                       | Cell Signaling      | 3013, 3054            |
| anti-TBK1                       | Abcam               | ab40676               |
| anti-phospho TBK1 pS172         | Cell Signaling      | 5843                  |
| anti-IKKe                       | Cell Signaling      | 2690                  |
| anti-IRF3                       | Cell Signaling      | 4947                  |
| anti-phospho IRF3 pS396         | Cell Signaling      | 4962, 4302            |
| anti-STING                      | Cell Signaling      | 13647                 |
| anti-p38                        | Cell Signaling      | 9212                  |
| anti-phospho p38<br>pT180/pY183 | Cell Signaling      | 4511                  |
| anti-p65 RelA                   | Cell Signaling      | 8242                  |
| anti-phospho p65 pS536          | Cell Signaling      | 3033                  |
| anti-histone H3                 | Cell Signaling      | 4499                  |
| anti-ISG15                      | Cell Signaling      | 2743                  |
| anti-beta actin                 | Sigma               | A5441                 |

**Supplemental Methods Table 3: Flow cytometry antibodies**

| <b>Antibody</b>                         | <b>Manufacturer</b> | <b>Catalog number</b> |
|-----------------------------------------|---------------------|-----------------------|
| anti-CD45 FITC                          | BioLegend           | 103108                |
| anti-Siglec F PE                        | BD Pharmingen       | 552126                |
| anti-CD8 PE-CF594                       | BioLegend           | 100762                |
| anti- $\gamma$ $\Delta$ TCR PerCP-Cy5.5 | BioLegend           | 118118                |
| anti-CD64 PE-Cy7                        | BioLegend           | 139314                |
| anti-CD4 AlexaFluor 700                 | BioLegend           | 100430                |
| anti-CD11b APC-Cy7                      | BioLegend           | 101225                |
| anti-Ly6C BV421                         | BD Horizon          | 562727                |
| anti-NK1.1 BV785                        | BioLegend           | 108749                |
| anti-CD11c BV605                        | BioLegend           | 117333                |
| anti-Ly6G APC                           | BioLegend           | 127613                |



**Supplemental Figure 1: After intratracheal administration, M-TBK1 mice have a less severe host response to influenza than WT mice. (A)** Survival and **(B)** weight curve for mice infected intratracheally with 800 EID PR8 IAV (366 TCID<sub>50</sub>) influenza PR8. The amount of virus is similar in the two genotypes, when measured by RT-PCR to identify H1N1 genomes (C) or by plaque-forming units (D).

**Supplemental Figure 2: Flow cytometry gating of lung digest cells.** Representative flow cytometry gating and analysis of cells from single cell lung digests of mice infected intranasally with influenza. Immune cell populations were identified as indicated.

**Supplemental Figure 3: M-TBK1 KO mice do not have altered immune cell populations in the blood or spleen.** Flow cytometry of (A) blood and (B) spleen from WT or M-TBK1 KO mice showing immune cell populations as a percent of CD45+ cells. N = 5 mice per genotype per group and two independent experiments.

**Supplemental Figure 4: Cytokine protein expression from M-TBK1 KO BMMs infected with IAV *in vitro* (A)** ELISA of supernatants from BMM infected with IAV (MOI 1) for 24 hours. Uninfected and mock infected cultures showed negligible cytokine expression and no difference between WT and KO samples and are not shown. **(B) BMM but not AM upregulate TBK1 mRNA after 6h of IAV infection.** RT-qPCR of TBK1 from BMM or AM infected *in vitro* with IAV. Error bars represent technical triplicates and two independent experiments.

**Supplemental Figure 5: Type 1 IFN expression in BAL (A)** ELISA of IFN $\alpha$  and IFN $\beta$  in BAL fluid of lungs harvested at days 3 and 6 post-infection. N=3-8 mice per point and two separate experiments analyzed by Mann-Whitney u test.

**Supplemental Figure 6: RT-qPCR of (A) AM or (B) BMM infected with MOI 1 PR8 IAV *in vitro*** for 6 hours or 6 hours and 24 hours. Data were normalized to the 18S mRNA and expressed as fold change compared to uninfected WT by  $\Delta\Delta$ Ct method. N = 3 per group and two independent experiments.

**Supplemental Figure 7: Gene expression in macrophage subpopulations isolated from IAV-infected lungs.** Macrophage subpopulations were isolated by FACS from lung digests at day 4 p.i. and subjected to RT-qPCR of indicated genes. mRNA levels were measured by qRT-PCR and normalized to ActB or to 18S by  $\Delta\Delta$ Ct. Data reflect 3 pooled mice analyzed in technical triplicate.

Supplemental Figure 1

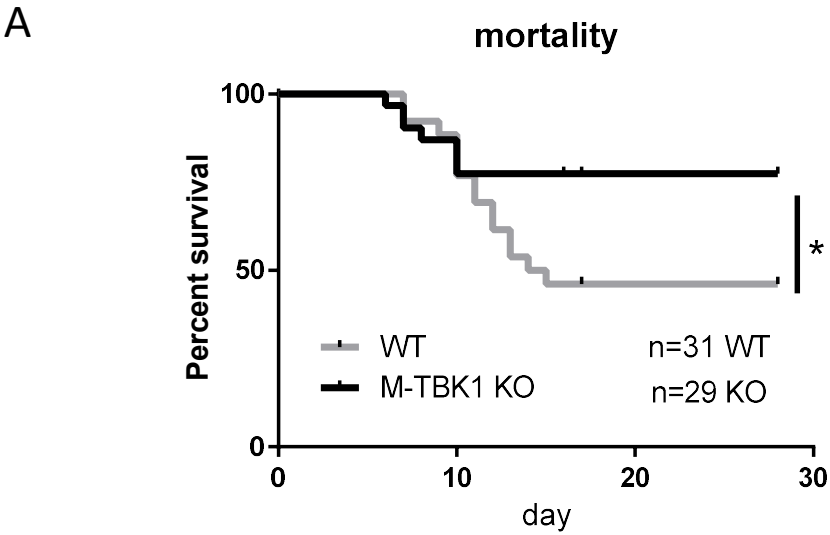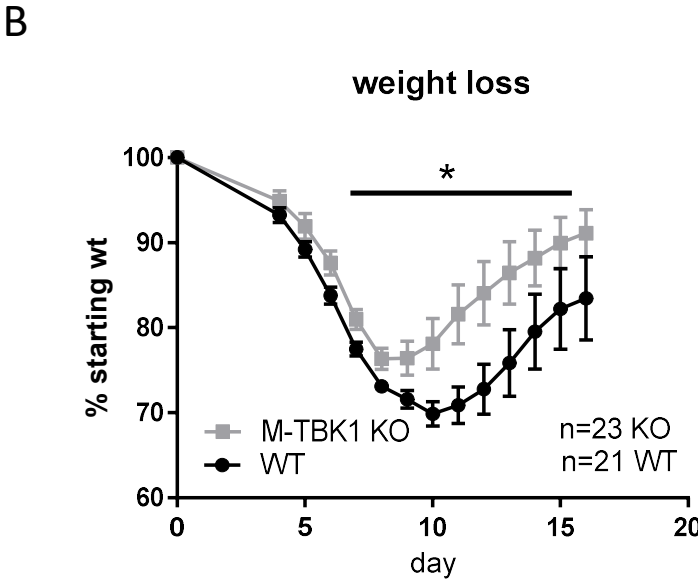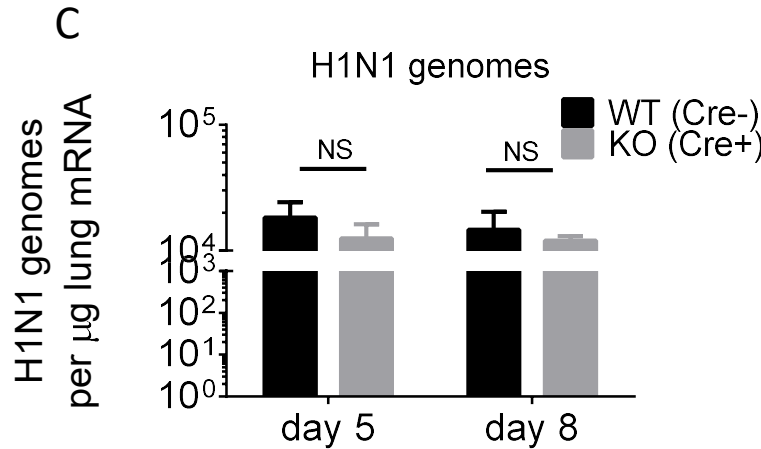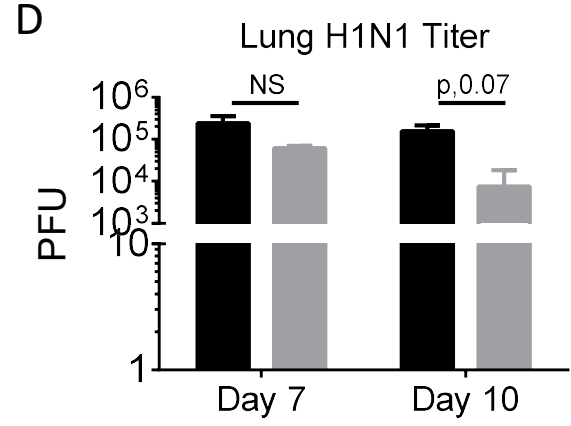

# Supplemental figure 2

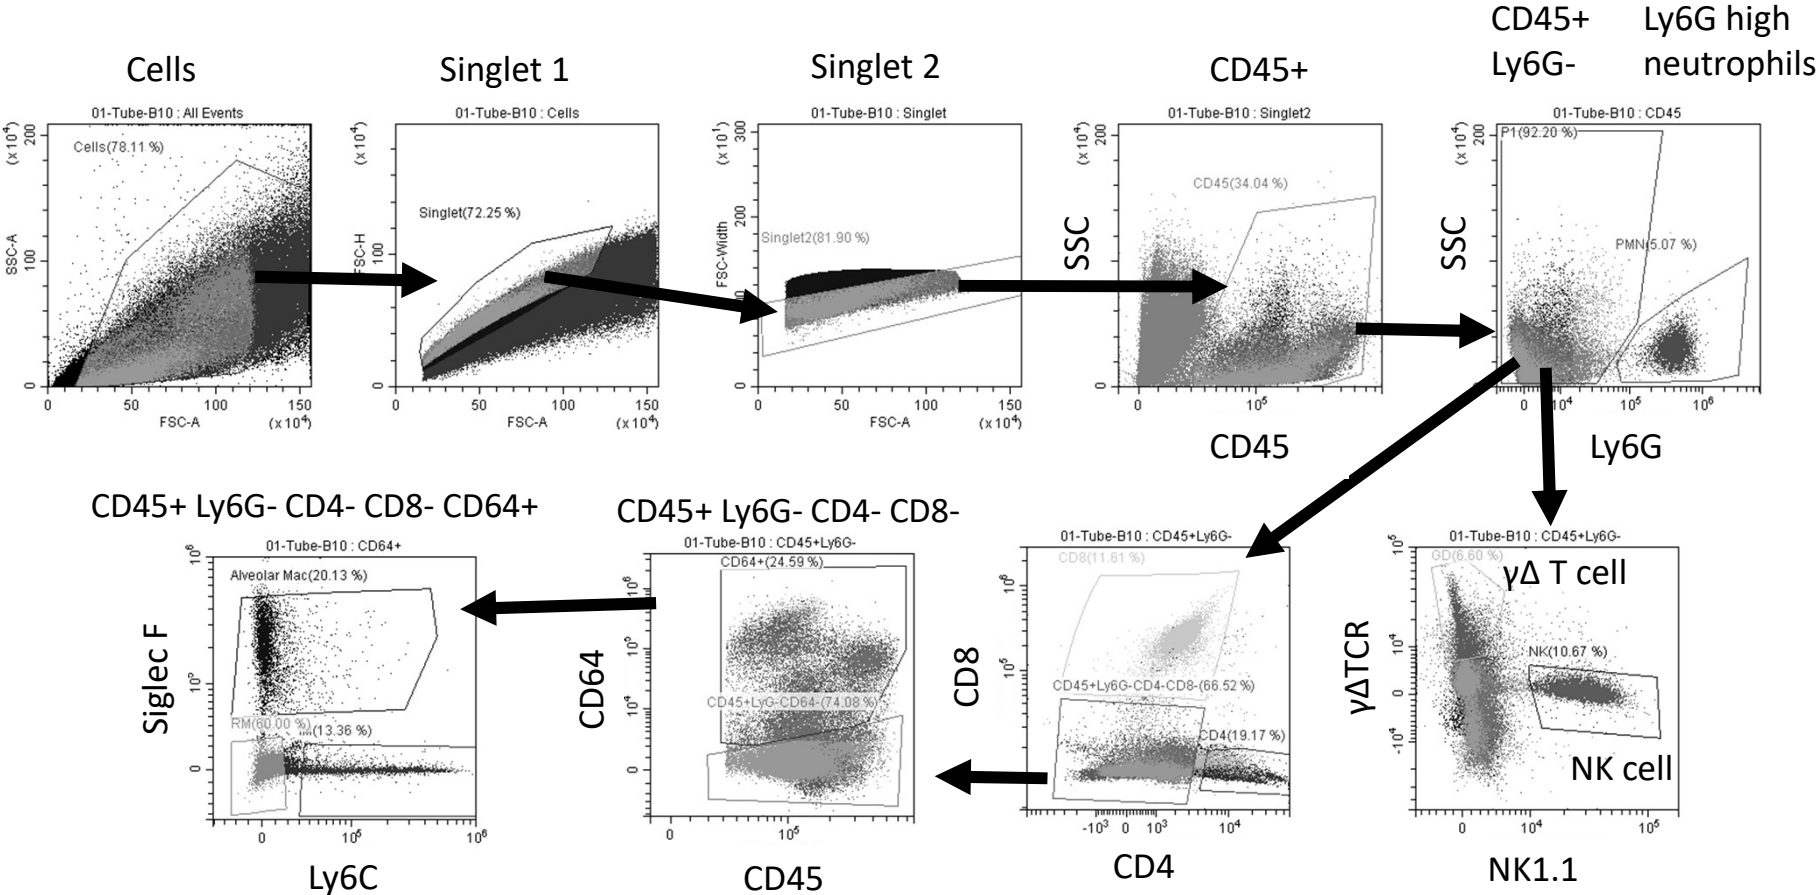

# Supplemental figure 3

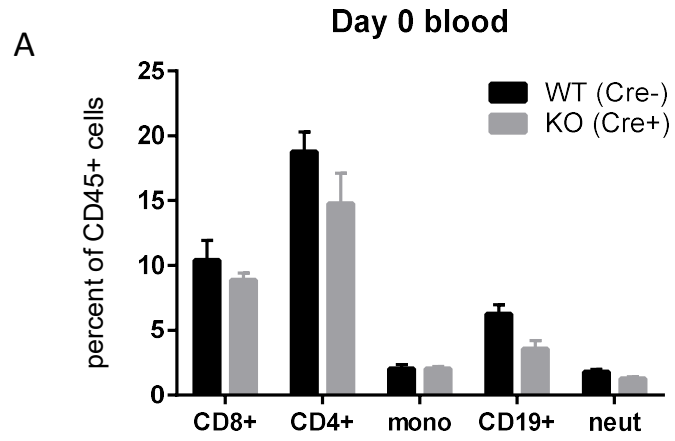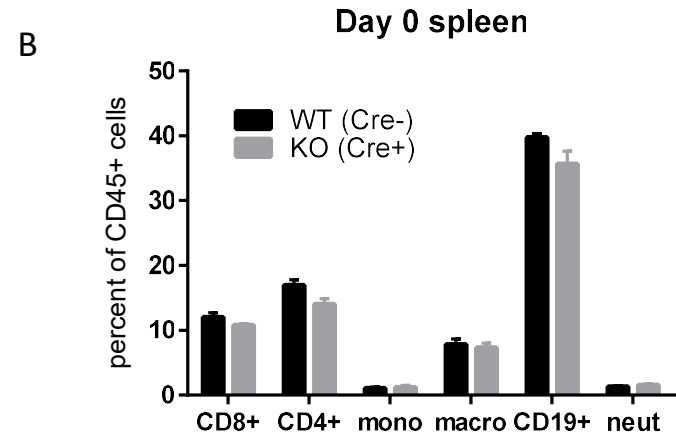

# Supplemental Figure 4

A

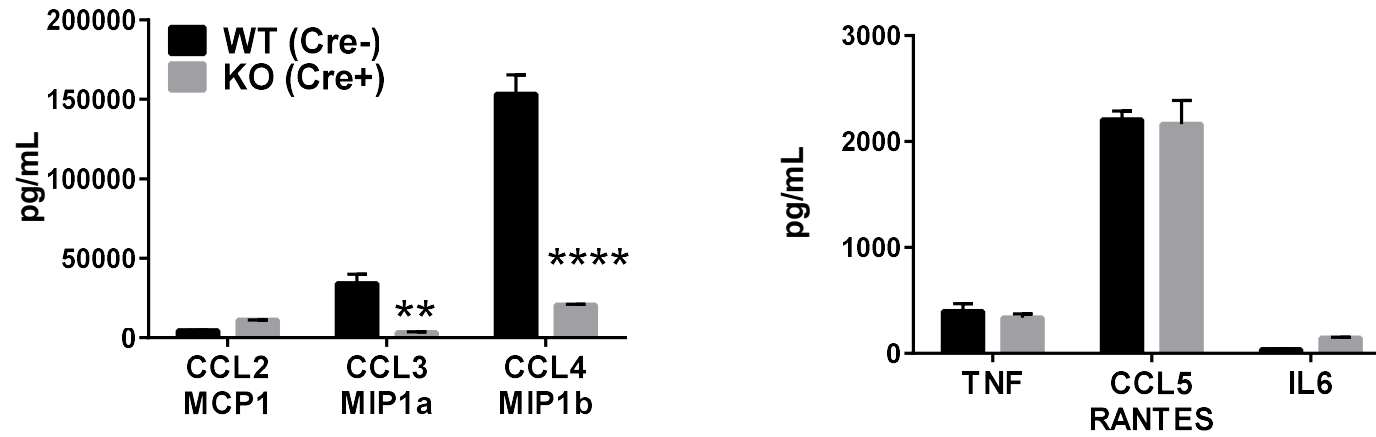

B

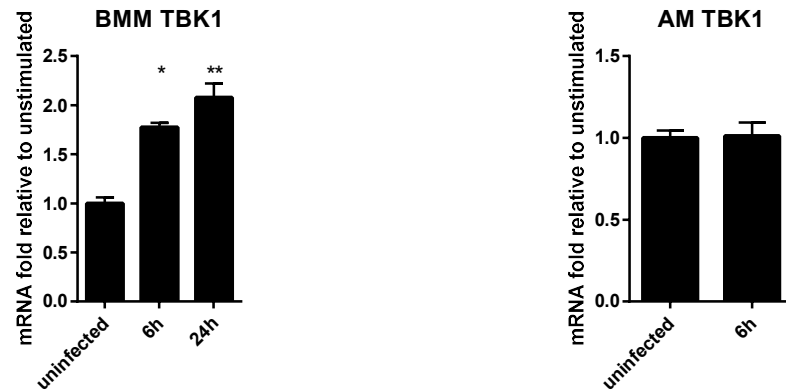

## Supplemental Figure 5

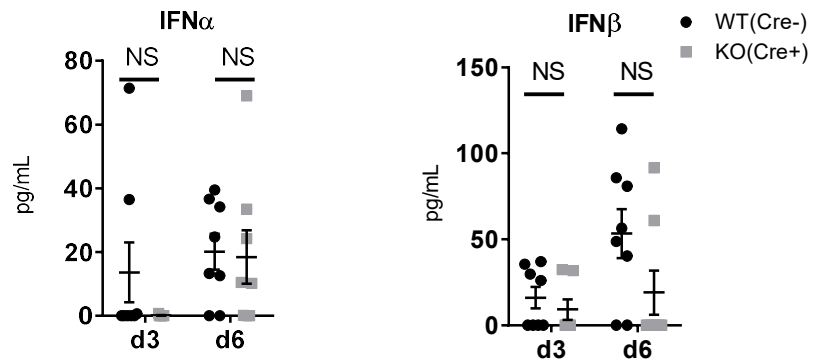

Supplemental  
Figure 6

A

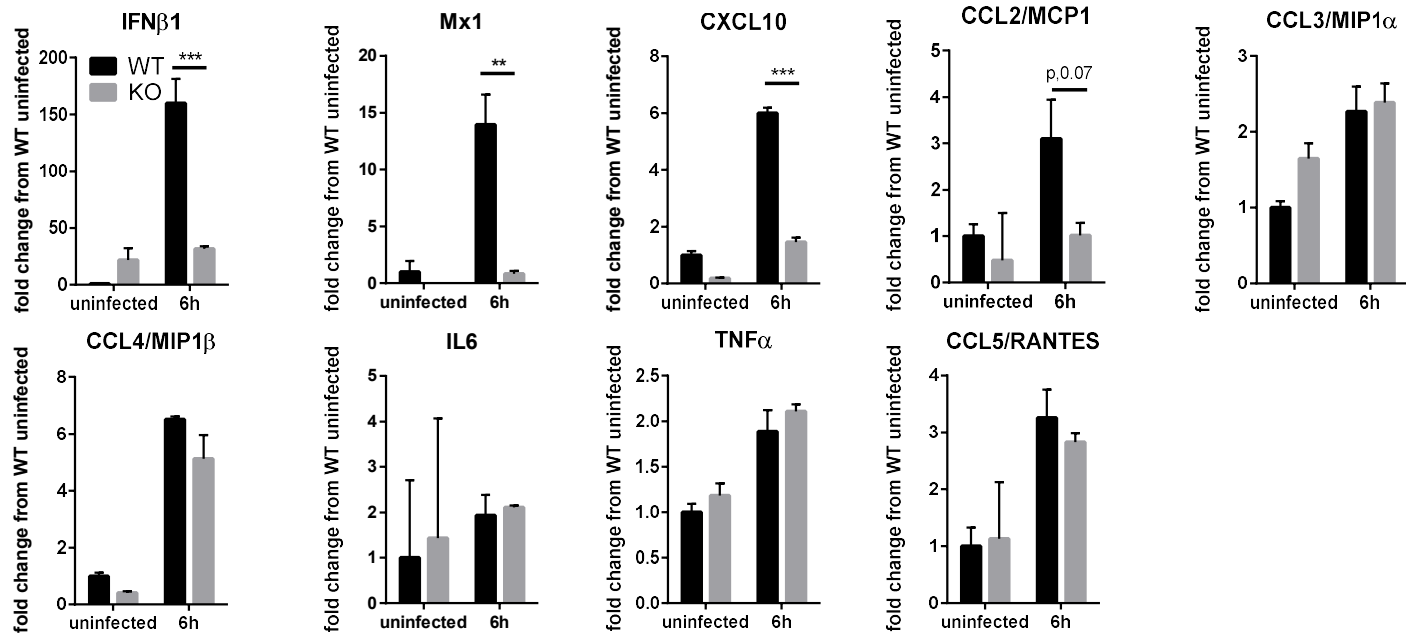

B

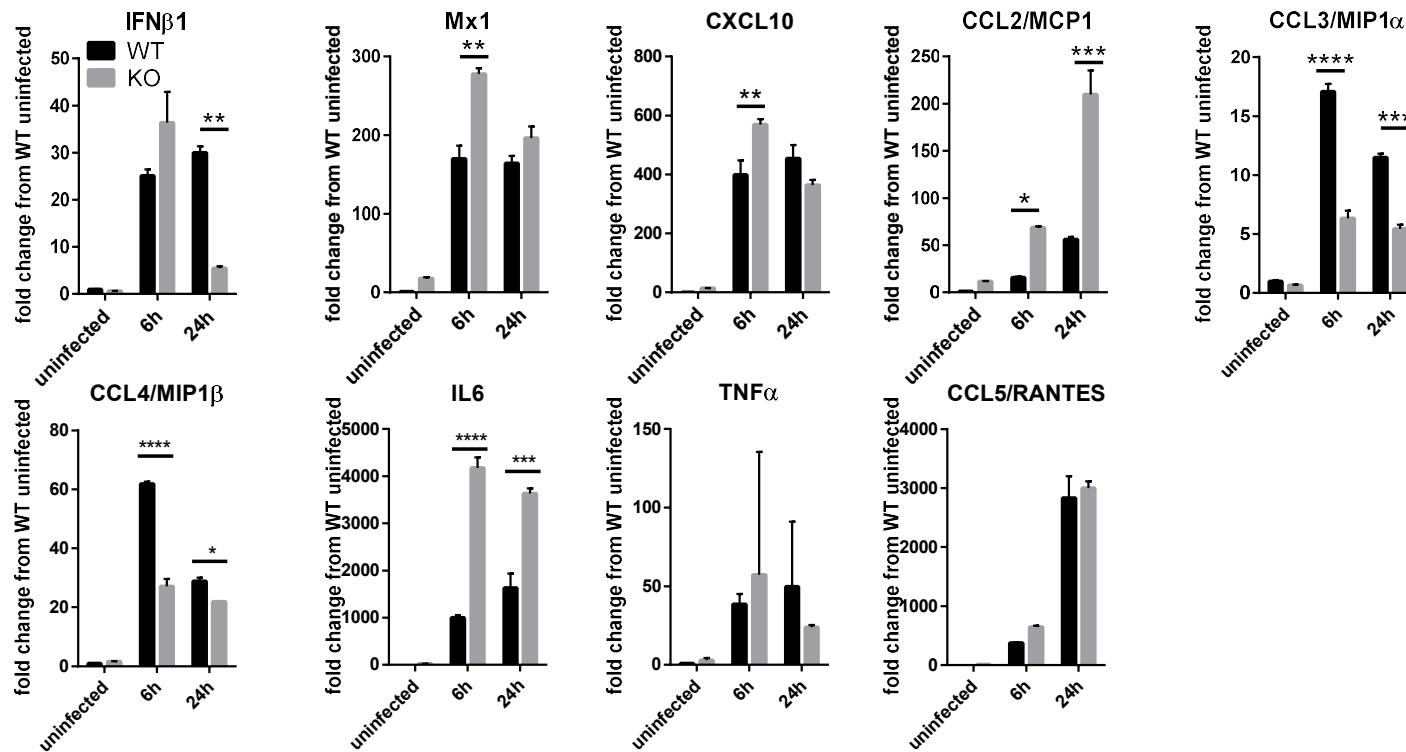

Supplemental  
Figure 7

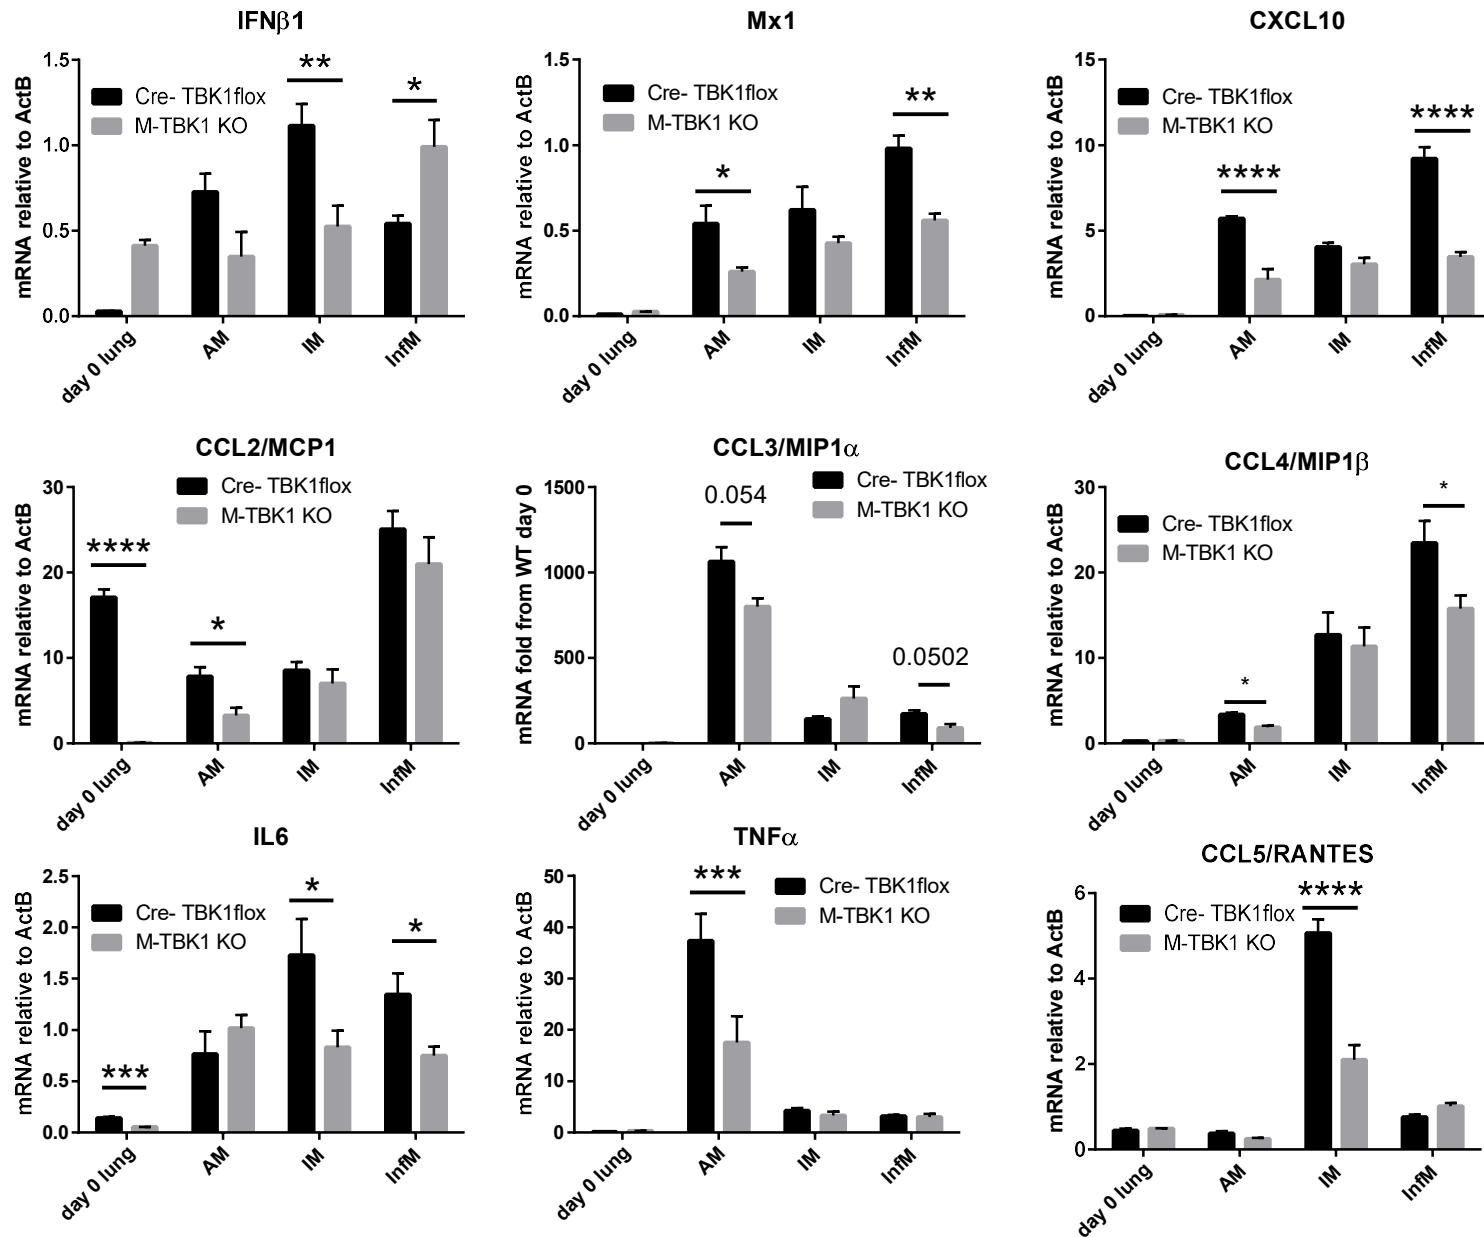

Supplement: rcmb.2018-0122OC_hagan_data_supplement.pdf [file rcmb.2018-0122OC_hagan_data_supplement.pdf]
